# Supplementary material for: Enhanced energy storage and rate performance induced by dense nanocavities inside MnWO4 nanobars
Source: Royal Society of Chemistry journal article supplement (doi:10.1039/c2ra20813j), 2012-01-01
Supplement: c2ra20813j.pdf [file c2ra20813j.pdf]

# Enhanced Energy Storage and Rate Performance Induced by Dense Nanocavities inside MnWO<sub>4</sub> Nanobars

En Zhang,<sup>b</sup> Zheng Xing,<sup>a</sup> Ji Wang,<sup>b</sup> Zhicheng Ju,<sup>\*a</sup> and Yitai Qian<sup>a,b</sup>

<sup>a</sup> Hefei National Laboratory for Physical Sciences at Microscale and Department of Chemistry, University of Science and Technology of China, Hefei, Anhui, 230026, P. R. China. Fax: +86-551-360-7402; Tel: +86-551-360-1589; E-mail: juzc@ustc.edu.cn

<sup>b</sup> School of Chemistry and Chemical Engineering, Shandong University, Jinan, 250100, P. R. China

## Experimental section

All reagents were analytical purity, and purchased from Shanghai Chemical Reagents Company without further purification.

**Synthesis of MnWO<sub>4</sub> Nanobars:** Equimolar amount of MnCl<sub>2</sub>·2H<sub>2</sub>O, Na<sub>2</sub>MoO<sub>4</sub> and appropriate amount of PVP were dissolved in 40 mL of distilled water to form a homogeneous aqueous solution. The resulting mixture was loaded into an autoclave in an electric oven at 140-180 °C for a period of 8-14 h. After heating, the autoclave was cooled down to room temperature naturally. The solid product was harvested by centrifugation and washed with deionized water several times and acetone once before 80 °C vacuum drying.

**Sample Characterization:** The X-ray powder diffraction (XRD) patterns of the products were carried out by a Bruker D8 advanced X-ray diffractometer equipped with Cu K $\alpha$  radiation ( $\lambda=1.5418$  Å). Transmission electron microscopy (TEM) images were taken on a JEM-1011 transmission electron microscope, using an accelerating voltage of 100 kV. The high-resolution transmission electron microscopy (HRTEM) images and the selected area electron diffraction (SAED) patterns were taken on a JEM-2100 transmission electron microscope.

**Electrochemical Measurements:** The electrochemical performance versus Li were carried out using coin-type cells (size: 2032). To prepare the working electrodes, the active materials (70 wt %), conductivity agent (Super P carbon black) (20 wt %) and binder (polyvinylidene fluoride) (10 wt %) dissolved in N-methyl pyrrolidone (NMP) were mixed and ball milled (QM-3SP2 Planetary Ball Mill produced by Nanjing University Instrument plant) at 400 rpm for 5 hours. Then the slurry was coated on a Cu foil and dried under vacuum at 80 °C for 24 hours. Li metal was applied as anode. The separator was Celgard 2300 microporous membrane, and the electrolyte was 1 M LiPF<sub>6</sub> solution dissolved in ethylene carbonate/dimethyl carbonate (EC/DMC) by 1:1 volume ratio. The coin cells were assembled in the argon-filled glove box (Mikrouna, Super 1900) with the concentrations of moisture and oxygen below 1 ppm, and galvanostatic charge/discharge cycling were performed using LAND-CT2001A multichannel galvanostat (Wuhan, China) in the voltage range of 0.01-3.0 V (vs. Li<sup>+</sup>/Li) at room temperature. The cyclic voltammetry (CV) profiles were carried out in the voltage window 0.01-3.0 V at a scan rate of 0.1 mV/s with an electrochemical workstation (LK-2005A).

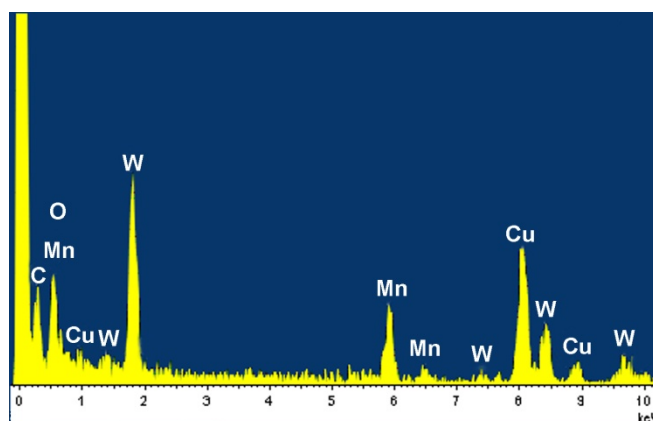

**Fig. S1.** The EDS spectrum of the MnWO<sub>4</sub> nanobars.

The corresponding EDS spectrum showed that the element here is mainly for W, Mn and O, while the peaks of Cu and C signal in the spectrum originates from the copper support of the specimen.

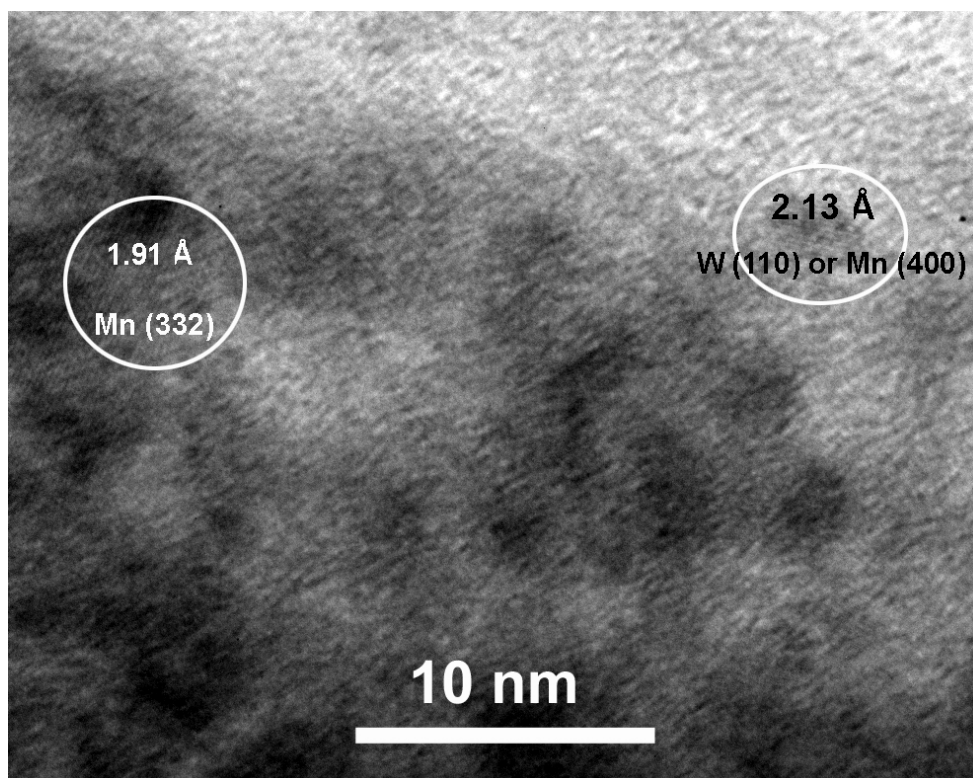

**Fig. S2.** The HRTEM image of MnWO<sub>4</sub> nanobars.
